# Supplementary material for: 18-Electron half-Heusler compound Ti0.75NiSb with intrinsic Ti vacancies as a promising thermoelectric material
Source: Royal Society of Chemistry journal article supplement (doi:10.1039/d2ta00461e), 2022-01-01
Supplement: d2ta00461e1.pdf [file d2ta00461e1.pdf]

## Supplementary Material

### 18-electron Half-Heusler Compound $\text{Ti}_{0.75}\text{NiSb}$ with Intrinsic Ti

#### Vacancies as Promising Thermoelectric Materials

Feng Luo<sup>a</sup>, Jian Wang<sup>a</sup>, Can Zhu<sup>a</sup>, Xiong He<sup>b</sup>, Shun Zhang<sup>a</sup>, Jiafu Wang<sup>a</sup>, Hongxia Liu<sup>c,\*</sup>, Zhigang Sun<sup>a,c,\*</sup>

<sup>a</sup> State Key Laboratory of Advanced Technology for Materials Synthesis and Processing, Wuhan University of Technology, Wuhan 430070, People's Republic of China

<sup>b</sup> Wuhan National High Magnetic Field Center, Huazhong University of Science and Technology, Wuhan 430074, People's Republic of China

<sup>c</sup> Material science and Engineering School, Taiyuan University of Science and Technology, Taiyuan 030024, People's Republic of China

#### EPMA characterizations of $\text{Ti}_{1-x}\text{NiSb}$ ( $x=0.1, 0.15, 0.2, 0.225, 0.3$ ) sample

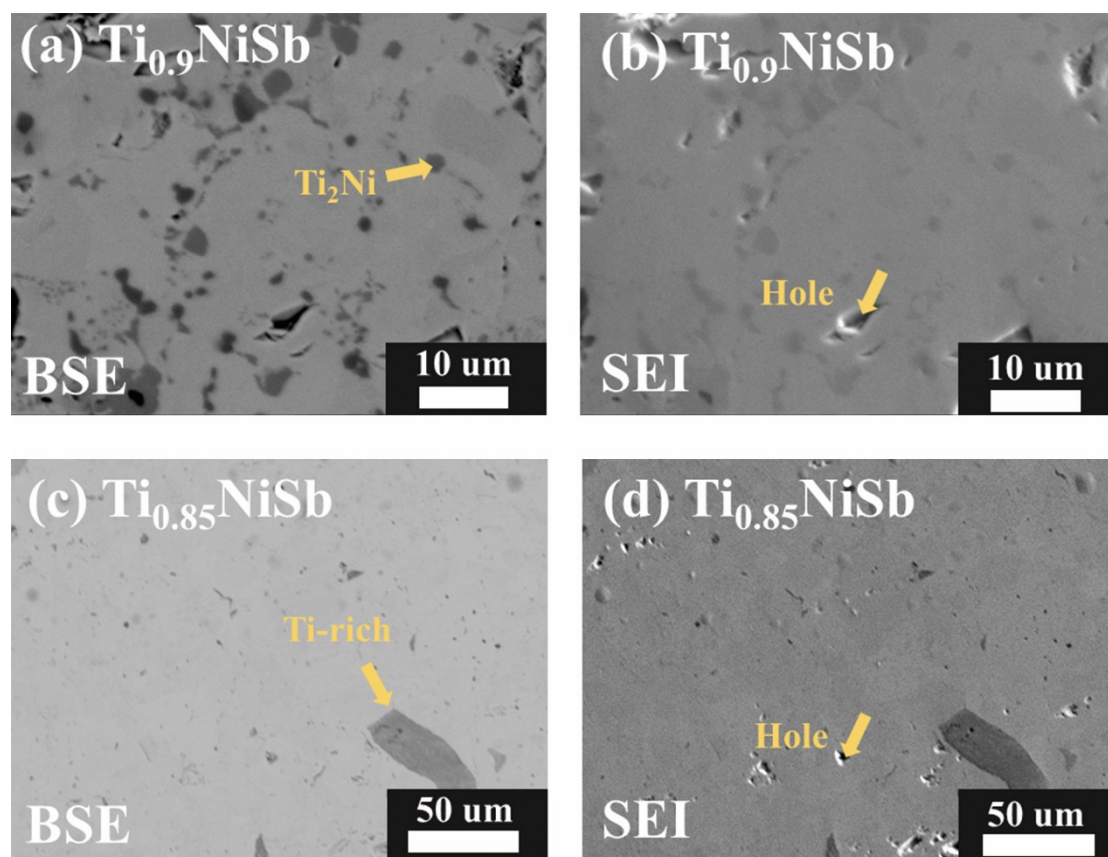

\* Corresponding authors.

E-mail addresses: sun\_zg@whut.edu.cn (Prof. Zhigang Sun) and hongxliu@126.com (Dr. Hongxia Liu)

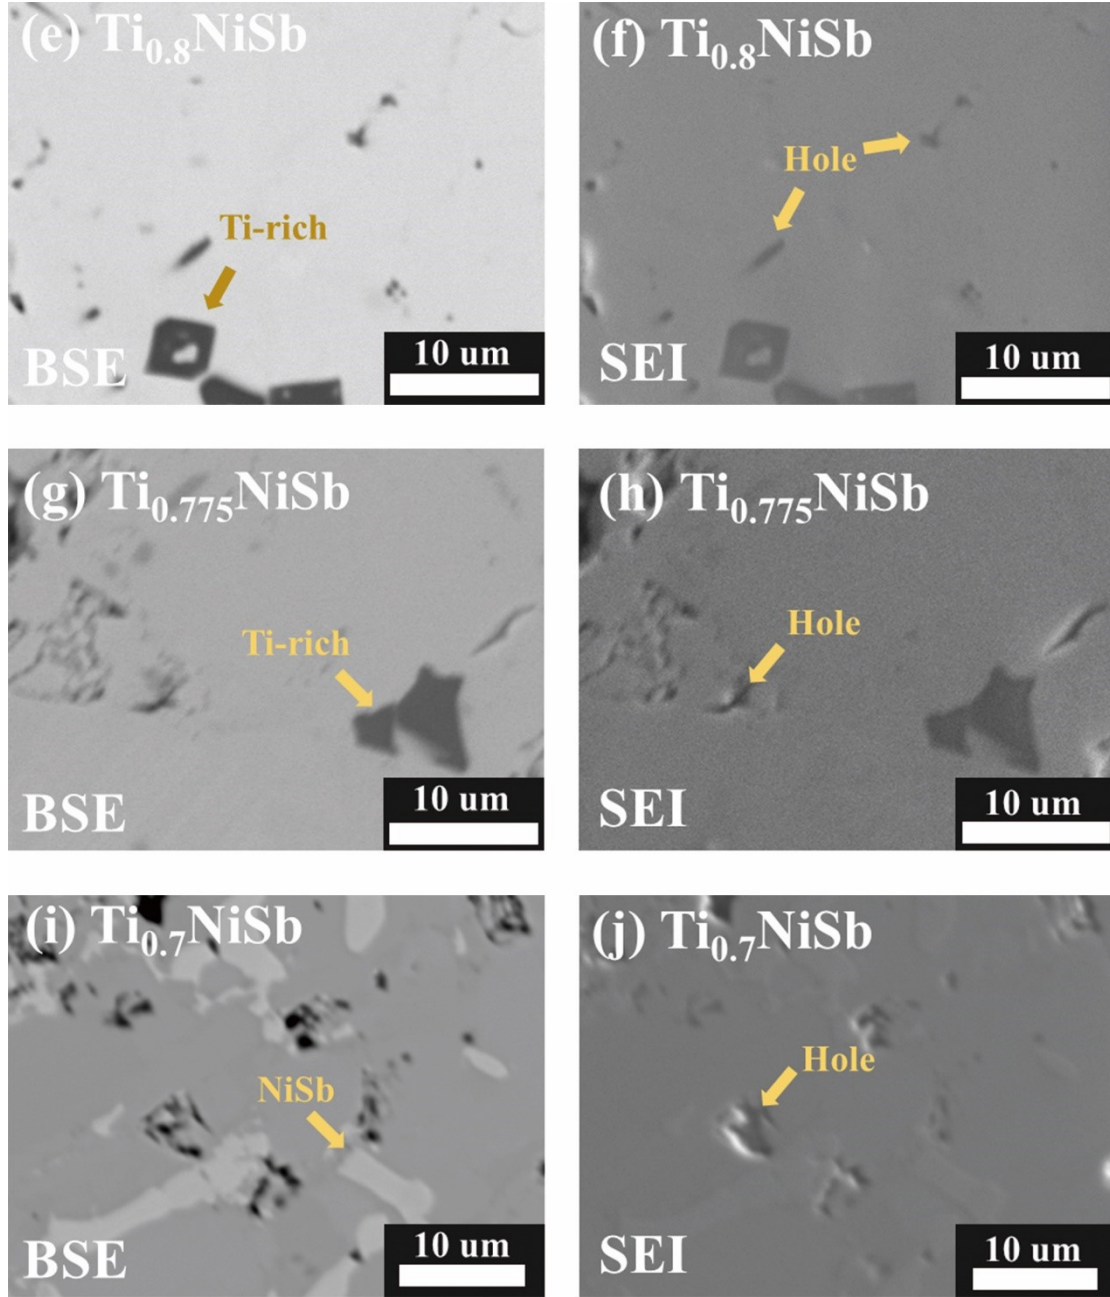

**Figure S1.** (a-j) BSE and SEI images of the polished surfaces of  $Ti_{1-x}NiSb$  ( $x=0.1, 0.15, 0.2, 0.225, 0.3$ ) samples, respectively.

As shown in Figure S1, in  $Ti_{0.9}NiSb$ , the second phase is  $Ti_2Ni$ . In  $Ti_{0.85}NiSb$ ,  $Ti_{0.8}NiSb$ ,  $Ti_{0.775}NiSb$ , the second phases are the Ti-rich one. In  $Ti_{0.7}NiSb$ , the second phase is NiSb.

### Electric transport model

Based on the SPB model, the Seebeck coefficient ( $\alpha$ ), hall concentration ( $n_H$ ), Lorenz number ( $L$ ) can be expressed as follow:

$$\alpha = \pm \frac{k_B}{e} \left[ \eta - \frac{(r + 5/2)F_{r+3/2}(\eta)}{(r + 3/2)F_{r+3/2}(\eta)} \right] \quad (1)$$

$$n_H = \frac{(2m_d^* k_B T)^{3/2} (r + 3/2)^2 F_{r+1/2}^2(\eta)}{3\pi^2 h^3 (2r + 3/2) F_{2r+1/2}(\eta)} \quad (2)$$

$$L = \frac{k_B^2}{e^2} \left[ r + 7/2 F_{r+5/2}(\eta) - \left( \frac{r + 5/2}{r + 3/2} \right)^2 F_{r+3/2}^2(\eta) \right] \quad (3)$$

where  $k_B$  is Boltzmann constant,  $e$  is carrier charge,  $r$  is scattering parameter,  $F_i(\eta)$  is Fermi-Dirac integral,  $\eta$  is reduced Fermi level  $E_f/(k_B T)$ ,  $m_d^*$  is the effective mass,  $h$  is Planck constant.

### Prediction of the thermoelectric properties of $\text{Ti}_{0.75}\text{NiSb}$

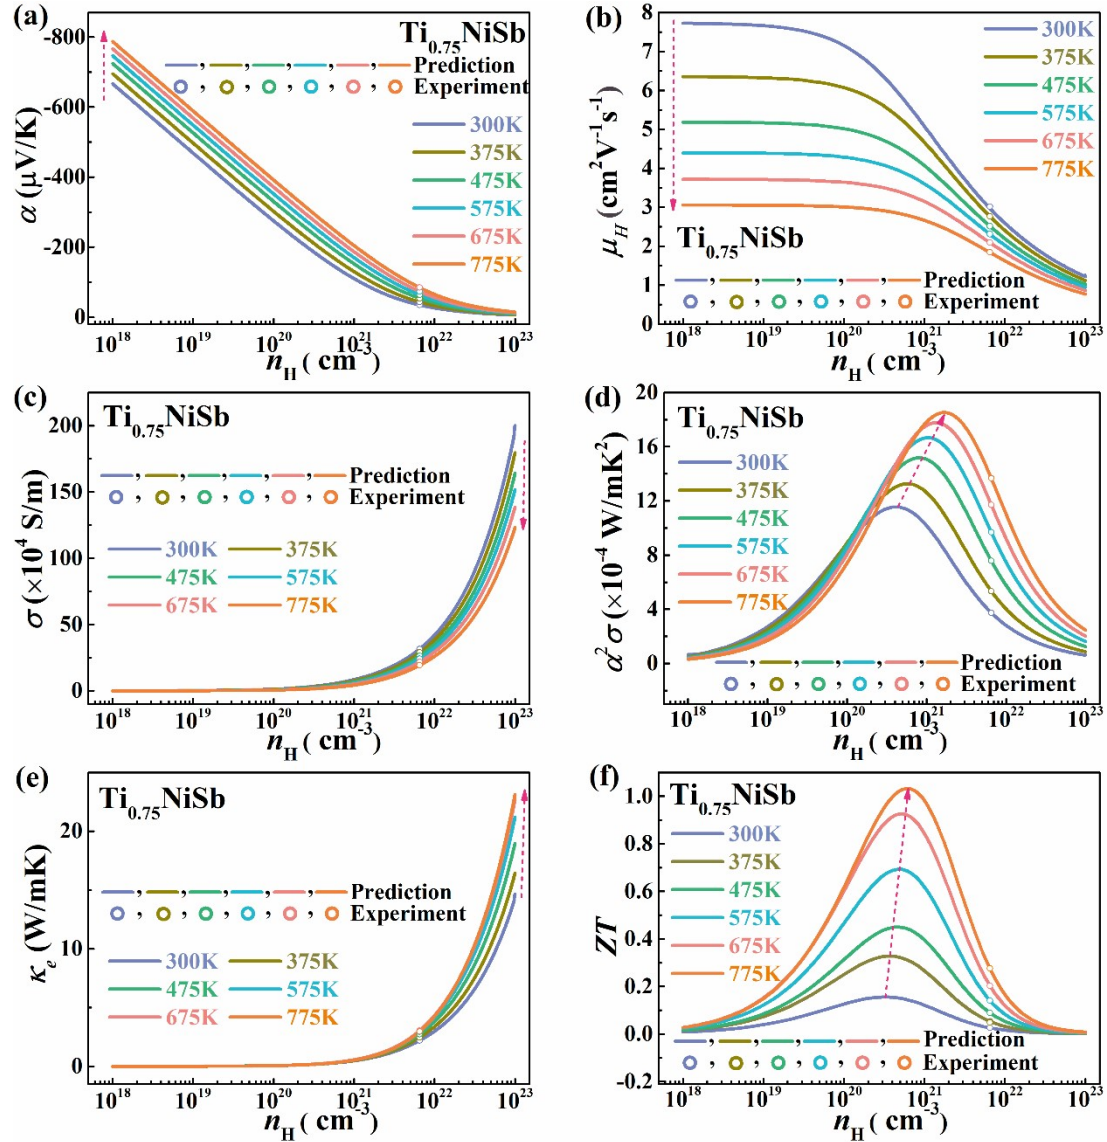

**Figure S2.** Experimental and calculated Seebeck coefficient(a), hall mobility(b), electrical conductivity(c), power factors(d), electronic thermal conductivity(e),  $ZT$ (f) as a function of Hall carrier concentration for  $\text{Ti}_{0.75}\text{NiSb}$ .

## Thermal Stability Test of $\text{Ti}_{0.75}\text{NiSb}$

TE performance cycle test on  $\text{Ti}_{0.75}\text{NiSb}$ . And the results are shown below.

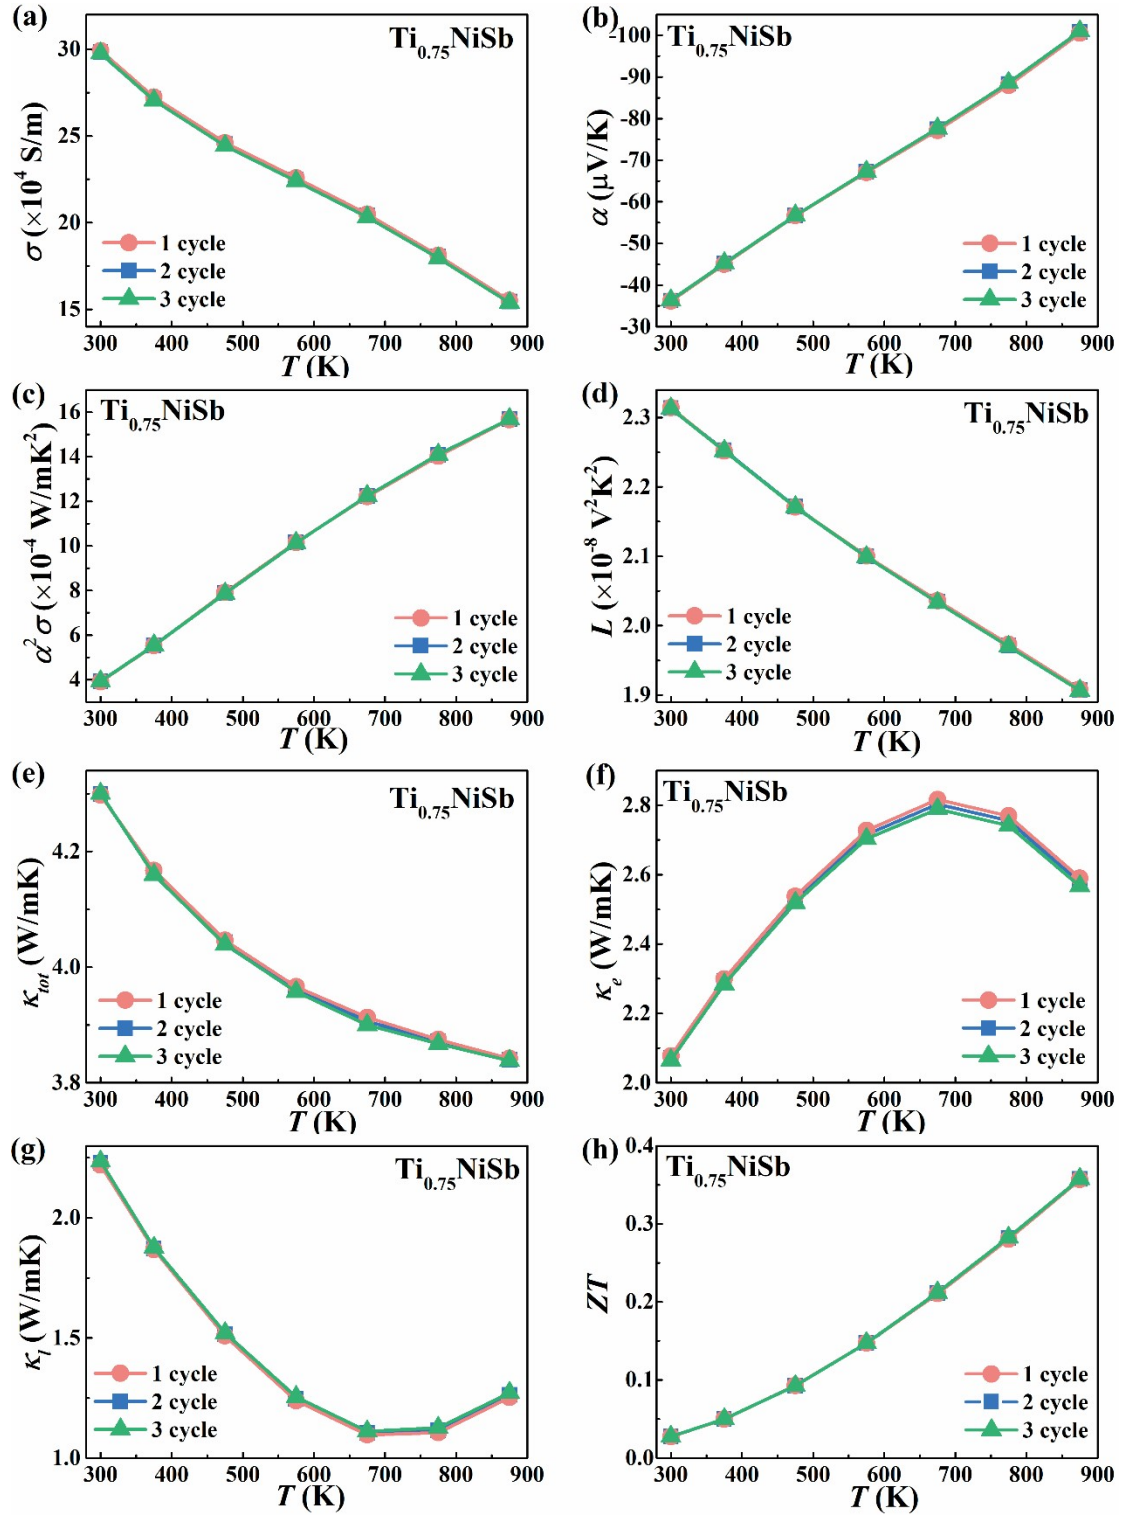

**Figure S3.** Temperature dependent (a) electrical conductivity, (b) Seebeck coefficient, (c) power factor, (d) Lorenz number, (e) thermal conductivity, (f) electronic thermal conductivity, (g) lattice thermal conductivity lattice thermal



conductivity and (h)  $ZT$  for  $\text{Ti}_{0.75}\text{NiSb}$  samples.

Multiple cycle tests did not significantly affect the TE performance of  $\text{Ti}_{0.75}\text{NiSb}$  which indicates that  $\text{Ti}_{0.75}\text{NiSb}$  has certain thermal stability.

### Calculated elastic properties of $\text{Ti}_{0.75}\text{NiSb}$ compound

The average sound velocity ( $v_s$ ), bulk modulus ( $B$ ), shear modulus ( $G$ ) and Young's modulus ( $E$ ), Poisson ratio ( $r$ ), Grüneisen parameter ( $\gamma$ ) are given respectively by<sup>1</sup>:

$$v_s = \left[ \frac{1}{3} \left( \frac{2}{v_t^2} + \frac{1}{v_l^2} \right) \right]^{1/3} \quad (4)$$

$$B = \left( v_l^2 - \frac{4}{3} v_s^2 \right) \rho \quad (5)$$

$$\theta_D = \left( \frac{h}{k_B} \right) \left( \frac{3N}{4\pi V} \right)^{1/3} v_s \quad (6)$$

$$G = \rho v_t^2 \quad (7)$$

$$E = \frac{9BG}{3B + G} = \frac{\rho v_t^2 (3v_l^2 - 4v_t^2)}{v_l^2 - v_t^2}$$

(8)

$$v = \frac{1 - 2(v_t/v_l)^2}{2 - 2(v_t/v_l)^2}$$

(9)

$$\gamma = \frac{3(1+r)}{2(2-3r)} \quad (10)$$

here,  $v_l$  and  $v_t$  are longitudinal and transverse sound velocities obtained from ultrasonic measurements, respectively, and  $\rho$  represents the density of  $\text{Ti}_{0.75}\text{NiSb}$ ,  $h$  is Planck's constant,  $k_B$  is the Boltzmann constant,  $N$  is the number of atoms in a unit cell,  $V$  is the unit-cell volume.

**Table S1.** Elastic properties for  $\text{Ti}_{0.75}\text{NiSb}$  at room temperature, including longitudinal ( $v_l$ ), shear ( $v_t$ ), average ( $v_s$ ) sound velocity, shear ( $G$ ), bulk ( $B$ ) and Young's ( $E$ ) modulus, Debye temperature ( $\theta_D$ ), and Poisson ratio ( $r$ ), Grüneisen parameter ( $\gamma$ ).

|                                                         | $\text{Ti}_{0.75}\text{NiSb}$ |
|---------------------------------------------------------|-------------------------------|
| Longitudinal sound velocity, $v_l$ ( $\text{ms}^{-1}$ ) | 5301                          |
| Shear sound velocity, $v_t$ ( $\text{ms}^{-1}$ )        | 2873                          |
| Average sound velocity, $v_s$ ( $\text{ms}^{-1}$ )      | 3206                          |
| Shear modulus, $G$ (GPa)                                | 59                            |
| Bulk modulus, $B$ (GPa)                                 | 123                           |
| Young's modulus, $E$ (GPa)                              | 153                           |
| Debye temperature, $\theta_D$ (K)                       | 360                           |
| Poisson ratio, $v$                                      | 0.29                          |
| Grüneisen parameter, $\gamma$                           | 1.72                          |

### **Supplementary references**

1. An, D.; Wang, J.; Zhang, J., *et al.*, Retarding Ostwald ripening through Gibbs adsorption and interfacial complexions leads to high-performance SnTe thermoelectrics. *Energy & Environmental Science* **2021**, *14* (10), 5469-5479.
